# Supplementary material for: Distinctive stability of a free-standing monolayer clay mineral nanosheet via transmission electron microscopy
Source: Royal Society of Chemistry journal article supplement (doi:10.1039/d0cp04659k), 2020-01-01
Supplement: d0cp04659k1.pdf [file d0cp04659k1.pdf]

## Supplementary Information

# Distinctive Stability of Free-standing Monolayer Clay Mineral Nanosheet Under Transmission Electron Microscopy

*Ikumi Akita, Yohei Ishida\*, Tetsu Yonezawa\**

Division of Materials Science and Engineering, Faculty of Engineering, Hokkaido University, Kita 13  
Nishi 8, Kita-ku, Sapporo, Hokkaido 060-8628, Japan

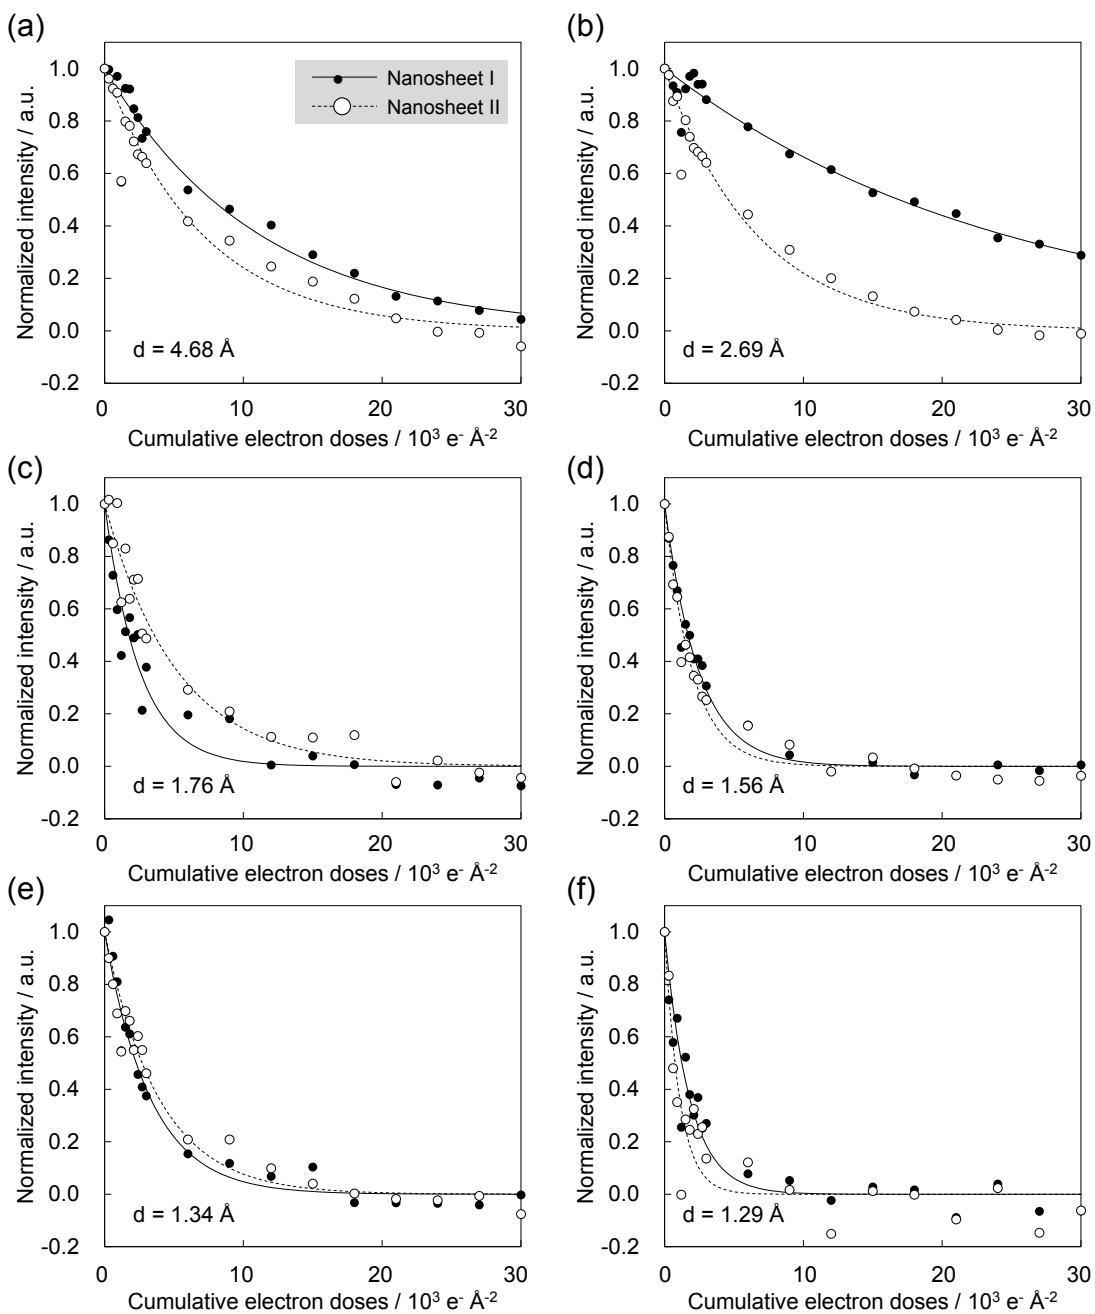

**Figure S1.** Relative intensity decay for the d-spacing of (a) 4.68, (b) 2.69, (c) 1.76, (d) 1.56, (e) 1.34, (f) 1.29 Å as a function of the cumulative electron doses for the two component nanosheets (noted as nanosheet I and II) in 2L Mt as indicated by red and blue circles in Figure 2b. Note that the value plotted in Figure 3 as 2L Mt is the average of the normalized intensity for nanosheet I and nanosheet II.

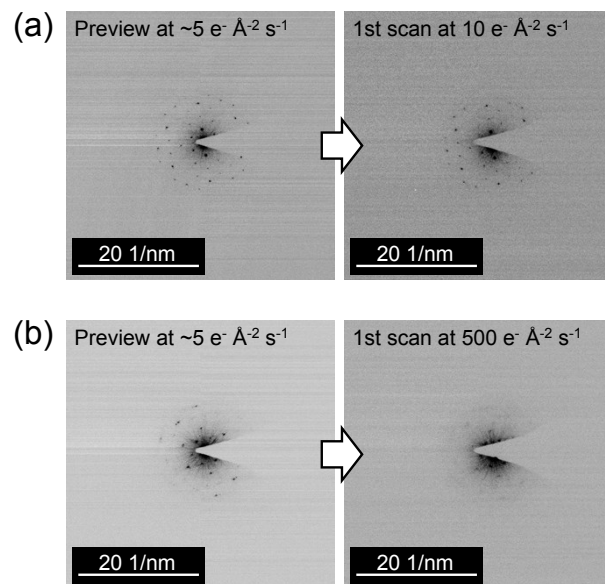

**Figure S2.** SAED patterns taken by 1st scanning at the dose rate of (a)  $10 \text{ e}^- \text{ \AA}^{-2} \text{ s}^{-1}$  and (b)  $500 \text{ e}^- \text{ \AA}^{-2} \text{ s}^{-1}$ . Preview SAED images shown together were taken at the low dose rate of  $\sim 5 \text{ e}^- \text{ \AA}^{-2} \text{ s}^{-1}$  to ensure that the target area are initially crystalline. The exposure time for all the patterns were 3s.
